# Supplementary material for: Estrogen-decreased hsa_circ_0001649 promotes stromal cell invasion in endometriosis
Source: PubMed Central journal article supplement (PMC7497355; doi:10.1530/rep-19-0540), 2020-07-06

hsa\_circ\_0001649 SHPRH  
chr6:146209155-146216113  
NM\_173082 (417..439)  
440

back-splice junction

(1)

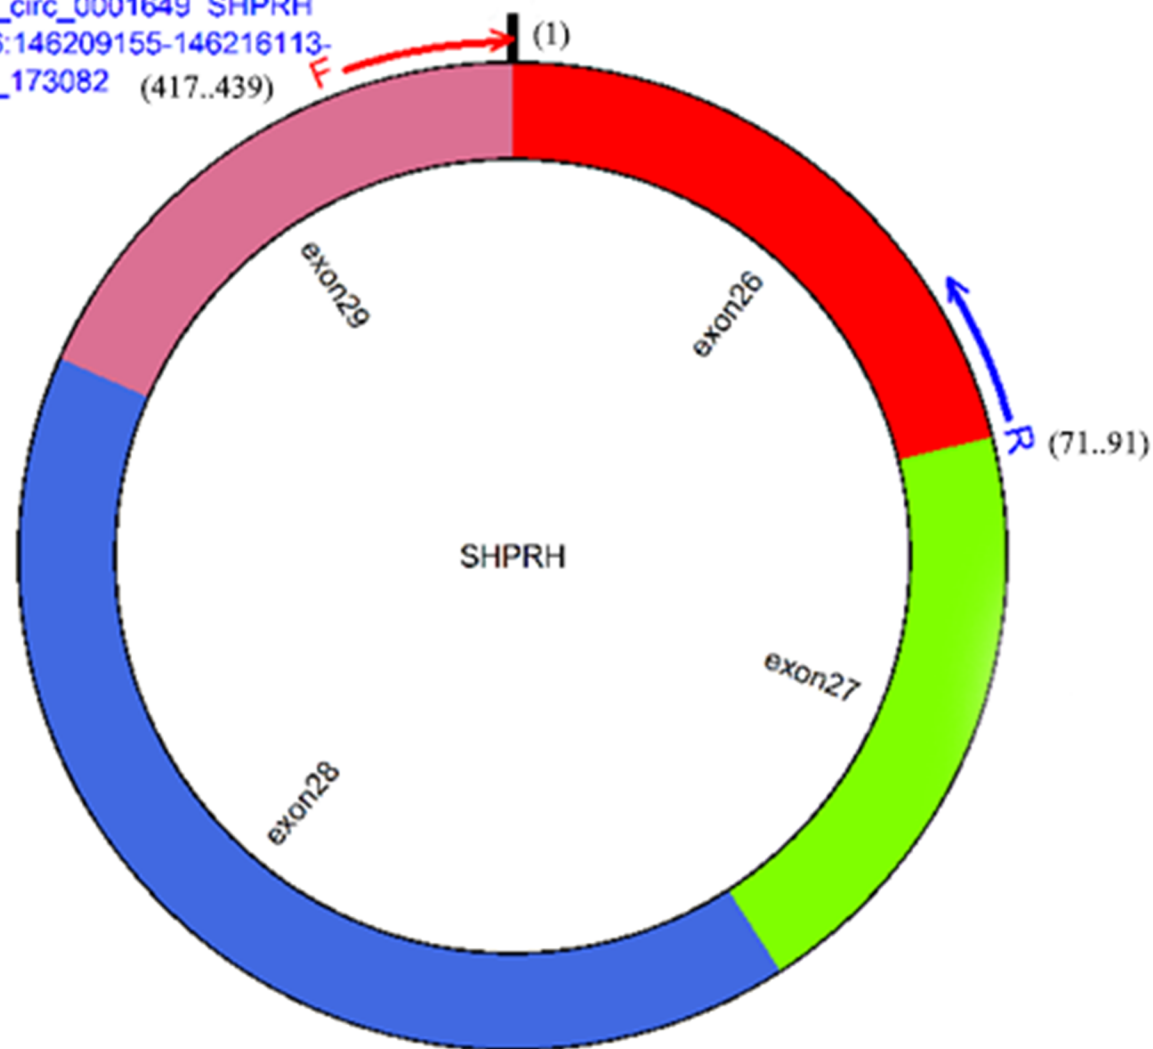

Supplement: supplementary_figure_1.pdf [file supplementary_figure_1.pdf]
