# Supplementary material for: Estrogen-decreased hsa_circ_0001649 promotes stromal cell invasion in endometriosis
Source: PubMed Central journal article supplement (PMC7497355; doi:10.1530/rep-19-0540), 2020-07-06

A

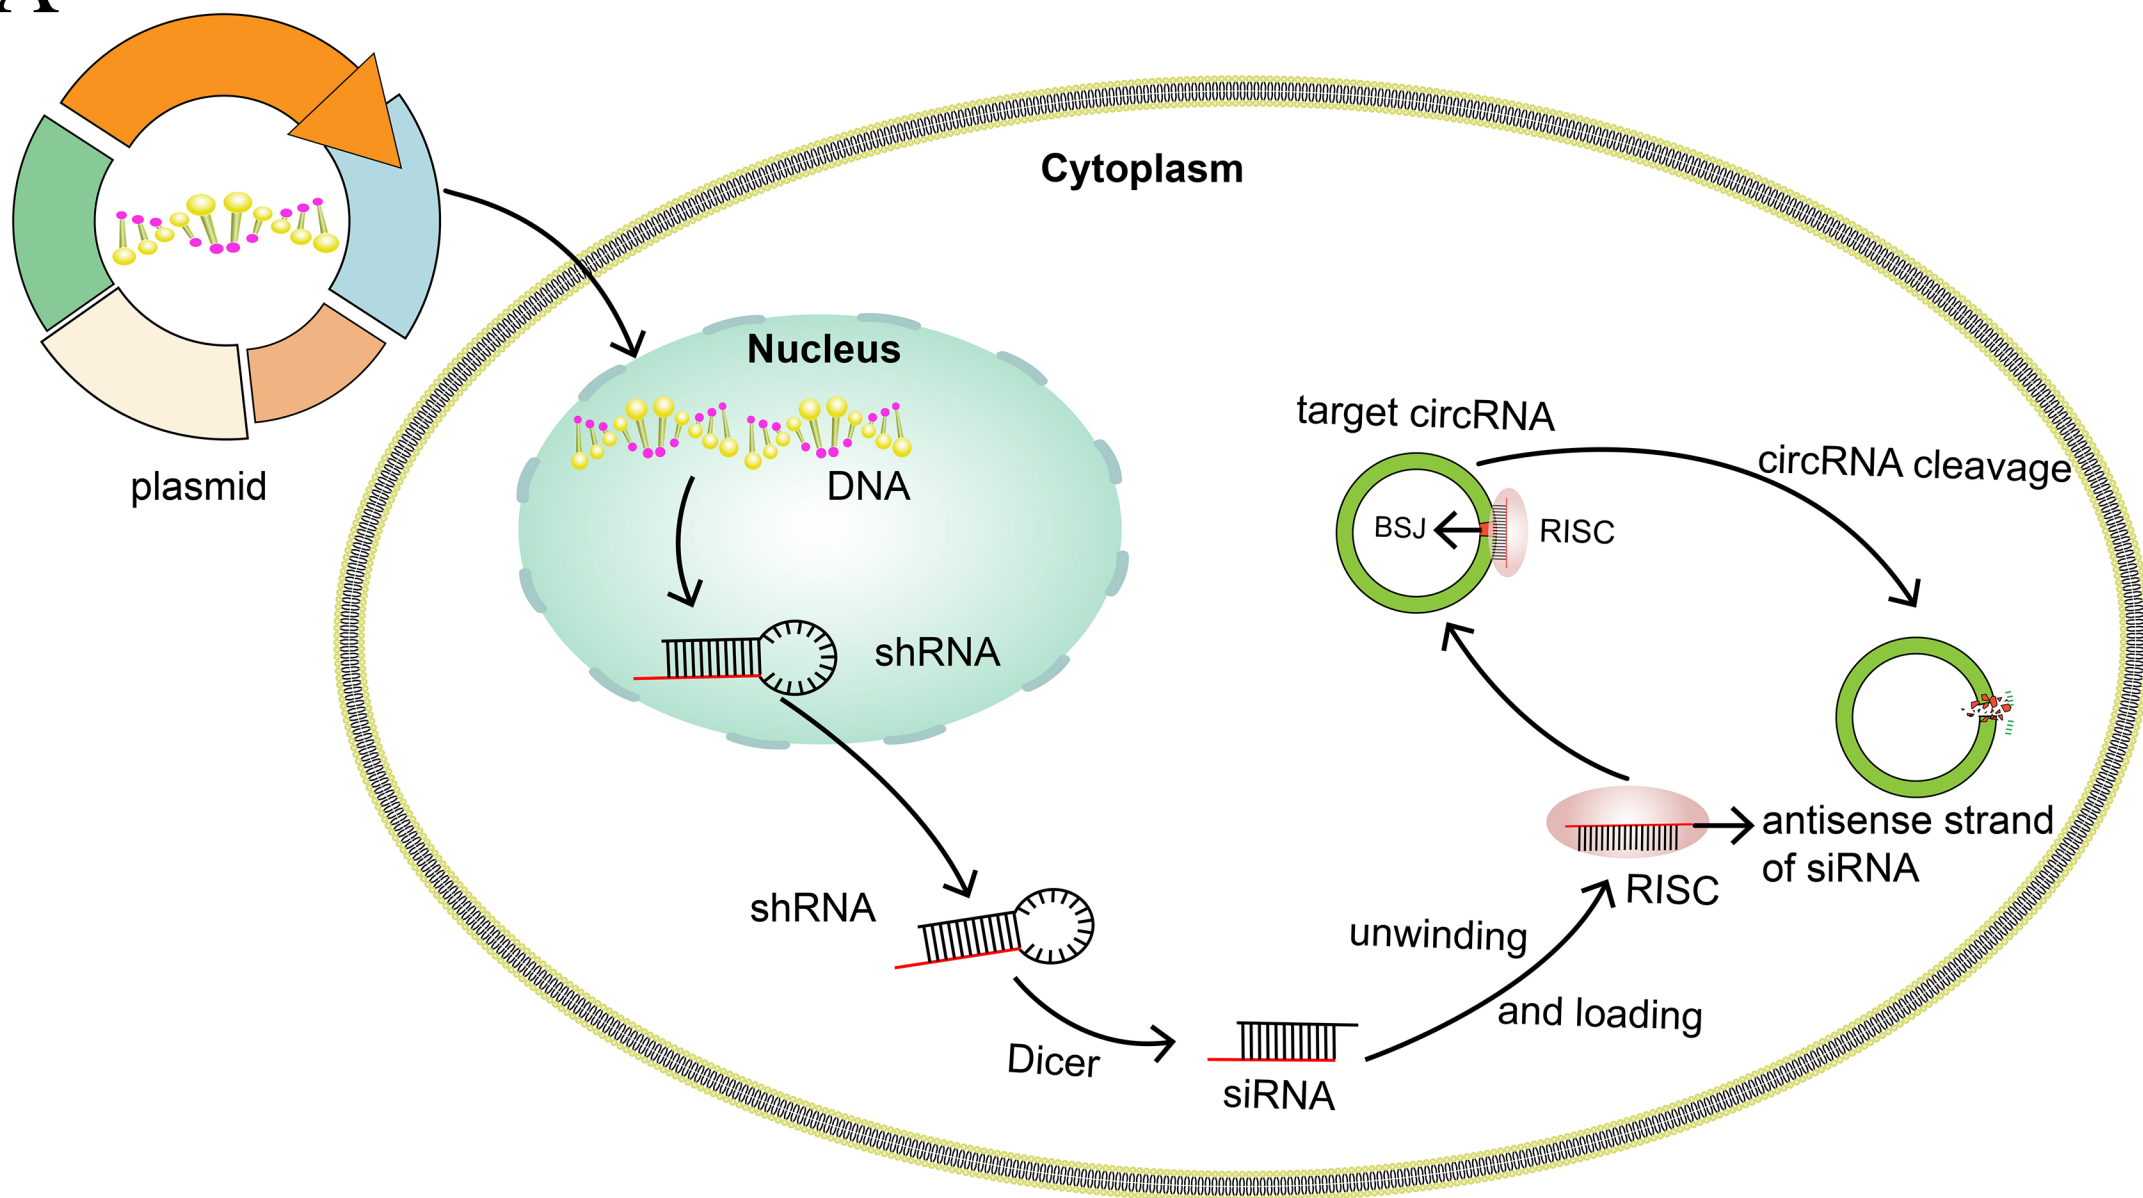

B

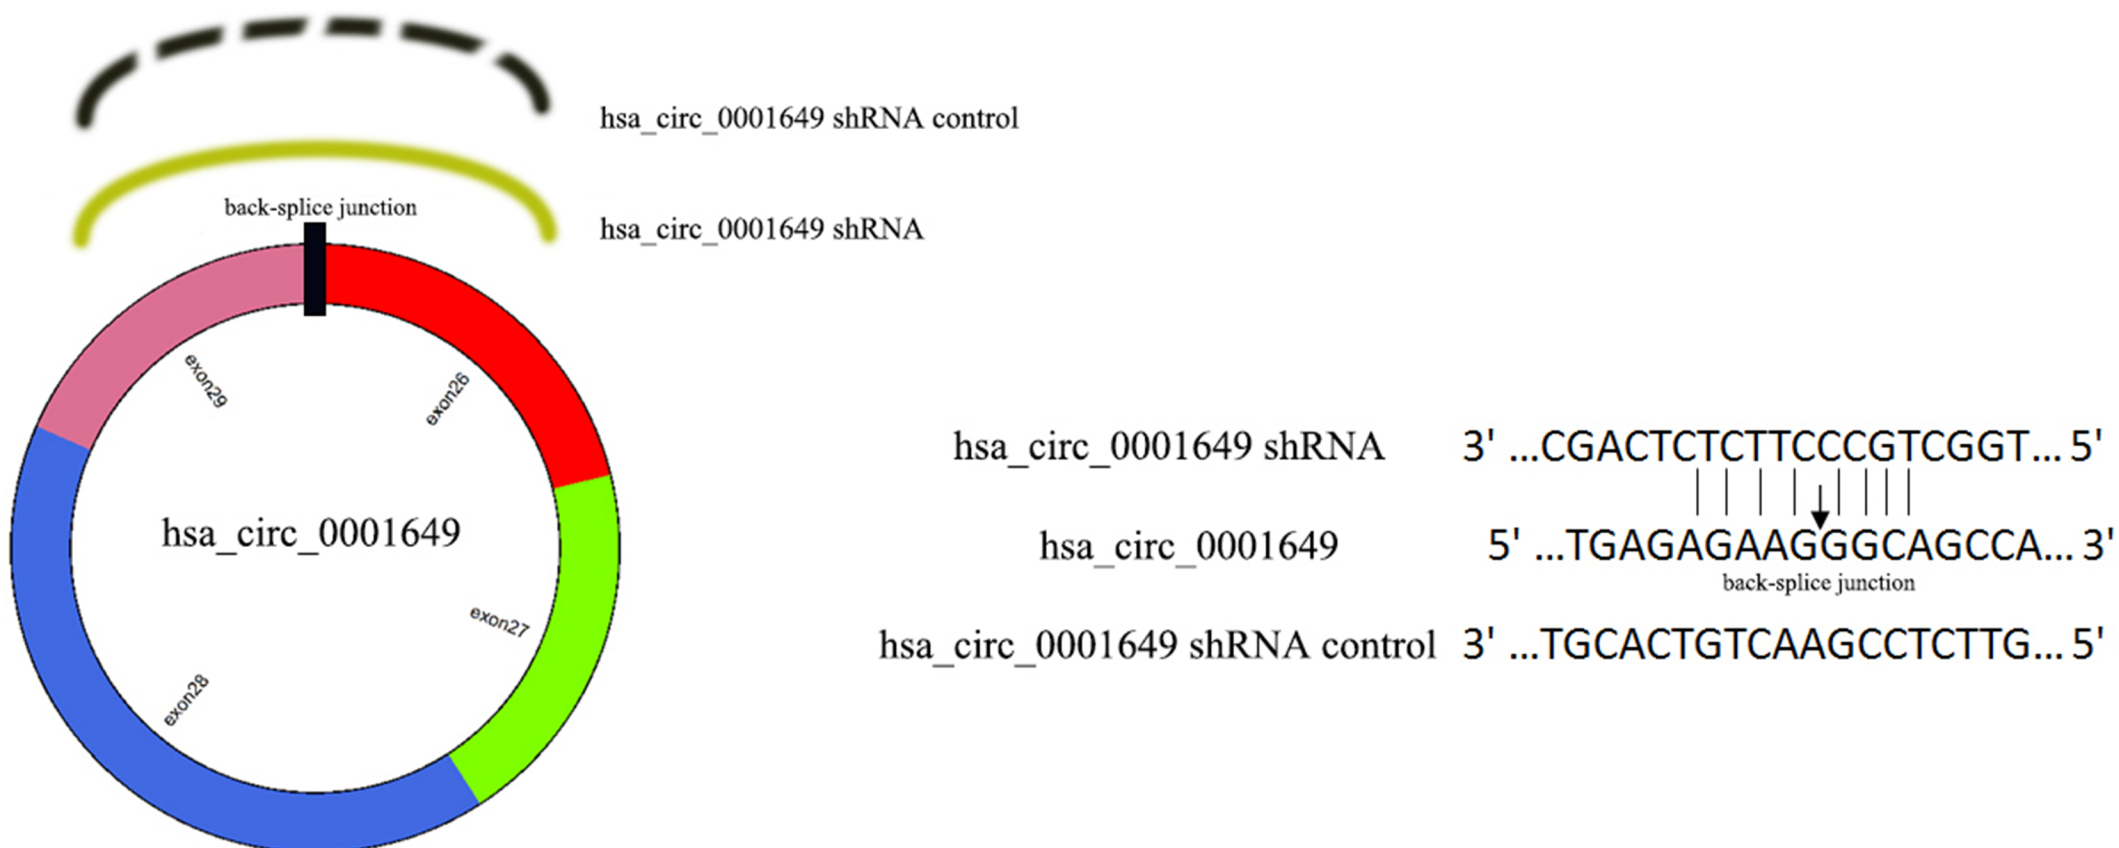

Supplement: supplementary_figure_2.pdf [file supplementary_figure_2.pdf]
