# Supplementary material for: Estrogen-decreased hsa_circ_0001649 promotes stromal cell invasion in endometriosis
Source: PubMed Central journal article supplement (PMC7497355; doi:10.1530/rep-19-0540), 2020-07-06
Supplement: supplementary_figure_3.pdf [file supplementary_figure_3.pdf]

# Cloned circRNA

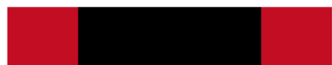

Nhe I

Hind III

Upstream fragment  
Downstream fragment

BGH pA

f1 ori

SV40 ori

Neomycin

pUC ori

SV40 pA

hsa\_circ\_0001649

pcDNA3.1

p CMV

Ampicillin

```
XXXXXXXXXXXXX GGCAGCCATTCTACAA  
AAGTGGAAGCTGTGGTCAGAACTCTGATGAA  
AATACAGCTTAGAGATCCAGGGGCCAAAGCA  
CTCGTTTTCTCAACGTGGCAAGATGTATTAGA  
TATTATTTCAAAAAGCTCTTACTGACAACAACA  
TGGAATTTGCACAAATCAGTCGTGTTAAGAC  
ATTTCAGGAGAACCTTTCAGCATTAAACGTG  
ATCCCCAAATCAATATTTTGCTGCTGCCCTG  
CACACAGGTTCTAATGGATTA ACTATCATTGA  
AGCAACTCATGTTCTCTTGGTGGAGCCCATAT  
TGAACCTGCCCATGAGCTTCAGGCCATAGG  
GAGGGTGCACCGAATTGGACAGACAAAACCT  
ACTATTGTACACAGATTCTTAATTAAGCAAC  
AATAGAAGAAAGAATGCAGGCAATGCTGAAA  
ACTGCTGAGAGAA GXXXXXXXXXXXXX
```

back-splice junction

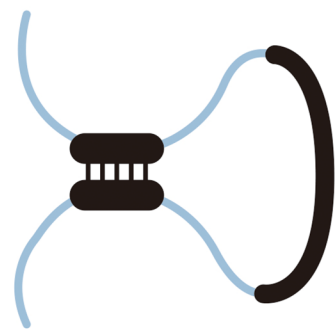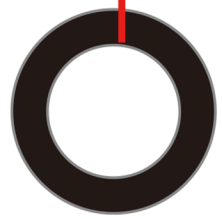

circRNA
