# Supplementary material for: Estrogen-decreased hsa_circ_0001649 promotes stromal cell invasion in endometriosis
Source: PubMed Central journal article supplement (PMC7497355; doi:10.1530/rep-19-0540), 2020-07-06
Supplement: supplementary_table_1.pdf [file supplementary_table_1.pdf]

## Supplementary material

**Supplementary Table 1.** Primer sequences.

| <b>Amplicon</b>  | <b>Primer FW (5'–3')</b>     | <b>Primer RV (5'–3')</b>    |
|------------------|------------------------------|-----------------------------|
| hsa_circ_0001649 | AATGCTGAAAAGCTGCTGAGA<br>GAA | TTGAGAAAACGAGTGCTTTG<br>G   |
| <i>SHPRH</i>     | ATGAGCAGCCGACGGAAACG         | ATCTGAACCTGGGCAGGGCT        |
| <i>MMP9</i>      | GCCTTCGCACTGTGGAGC           | GGATACCCGTCTCCGTGCTC        |
| <i>GAPDH</i>     | TCAGGCGTCTGTAGAGGCTT         | ATGCACATCCTTCGATAAGAC<br>TG |
