# Supplementary material for: Estrogen-decreased hsa_circ_0001649 promotes stromal cell invasion in endometriosis
Source: PubMed Central journal article supplement (PMC7497355; doi:10.1530/rep-19-0540), 2020-07-06
Supplement: supplementary_table_2.pdf [file supplementary_table_2.pdf]

## Supplementary material

**Supplementary Table 2.** Potential miRNA-circRNA binding sites predicted by CircInteractome and TargetScan.

| CircBase ID      | miRNA ID       | Binding site number |
|------------------|----------------|---------------------|
| hsa_circ_0001649 | hsa-miR-1231   | 1                   |
| hsa_circ_0001649 | hsa-miR-1250   | 1                   |
| hsa_circ_0001649 | hsa-miR-127-5p | 2                   |
| hsa_circ_0001649 | hsa-miR-140-3p | 1                   |
| hsa_circ_0001649 | hsa-miR-203    | 4                   |
| hsa_circ_0001649 | hsa-miR-223    | 1                   |
| hsa_circ_0001649 | hsa-miR-520f   | 1                   |
| hsa_circ_0001649 | hsa-miR-331-3p | 2                   |
| hsa_circ_0001649 | hsa-miR-338-5p | 1                   |
| hsa_circ_0001649 | hsa-miR-486-3p | 2                   |
| hsa_circ_0001649 | hsa-miR-488    | 2                   |
| hsa_circ_0001649 | hsa-miR-545    | 2                   |
| hsa_circ_0001649 | hsa-miR-548p   | 1                   |
| hsa_circ_0001649 | hsa-miR-571    | 1                   |
| hsa_circ_0001649 | hsa-miR-580    | 1                   |
| hsa_circ_0001649 | hsa-miR-604    | 1                   |
| hsa_circ_0001649 | hsa-miR-647    | 1                   |
| hsa_circ_0001649 | hsa-miR-649    | 2                   |
| hsa_circ_0001649 | hsa-miR-885-5p | 1                   |
| hsa_circ_0001649 | hsa-miR-889    | 1                   |
| hsa_circ_0001649 | hsa-miR-942    | 2                   |
